# Supplementary material for: Indole-3-Propionic Acid, a Gut-Derived Tryptophan Metabolite, Associates with Hepatic Fibrosis
Source: MDPI journal article supplement (doi:10.3390/nu13103509), 2021-10-05
Supplement: s1 [file s1]

# Indole-3-propionic acid, a gut-derived tryptophan metabolite, associates with hepatic fibrosis

Ratika Sehgal<sup>1</sup>, Mariana Ilha<sup>1</sup>, Maija Vaittinen<sup>1</sup>, Dorota Kaminska<sup>1</sup>, Ville Männistö<sup>2</sup>, Vesa Kärjä<sup>3</sup>, Marjo Tuomainen<sup>1</sup>, Kati Hanhineva<sup>1,4</sup>, Stefano Romeo<sup>5</sup>, Päivi Pajukanta<sup>6,7</sup>, Jussi Pihlajamäki<sup>1,8\*</sup>, Vanessa D. de Mello<sup>1\*</sup>

\*shared authorship

## Methods S1. Reagents and chemicals

Dulbecco's Modified Eagle's Medium, DMEM-F12 W/L-Glutamine W/15 MM HEPES (Biowest, L0093-500), Penicillin-Streptomycin Mixture (Pen/Strep) containing 10,000 units potassium penicillin and 10,000 µg streptomycin sulfate per mL (Lonza, DE17-602E), Fetal bovine serum, FBS (Gibco, 10270-106), Dulbecco's phosphate-buffered saline, DPBS (Biowest, L0615-500), Trypsin EDTA (T4049-500), fatty acid free-Bovine serum albumin, BSA (Sigma, A8806), 3-(4,5-Dimethylthiazol-2-yl)-2,5-Diphenyltetrazolium Bromide, MTT (Sigma, M5655), Recombinant Human TGF-β1 Protein (R&D systems, 240-B-002/CF), Indole-3-propionic acid, IPA (Sigma, 220027), Dimethyl sulfoxide, DMSO (Riedel-de Haën, 34943), β-mecaptoethanol (Sigma, 63689-100ML-F), Qubit<sup>TM</sup> RNA HS Assay Kit (Thermo Fischer, Q32855), RNeasy mini RNA extraction kit (Qiagen, 74106), High Capacity cDNA Reverse Transcription Kit (Thermo Fischer, 4368813), Sensifast SYBR Lo-ROX Kit (Bioline, BIO 94050), PCR primers were purchased from Metabion, Germany).

Figure S1. IPA measurements correlation

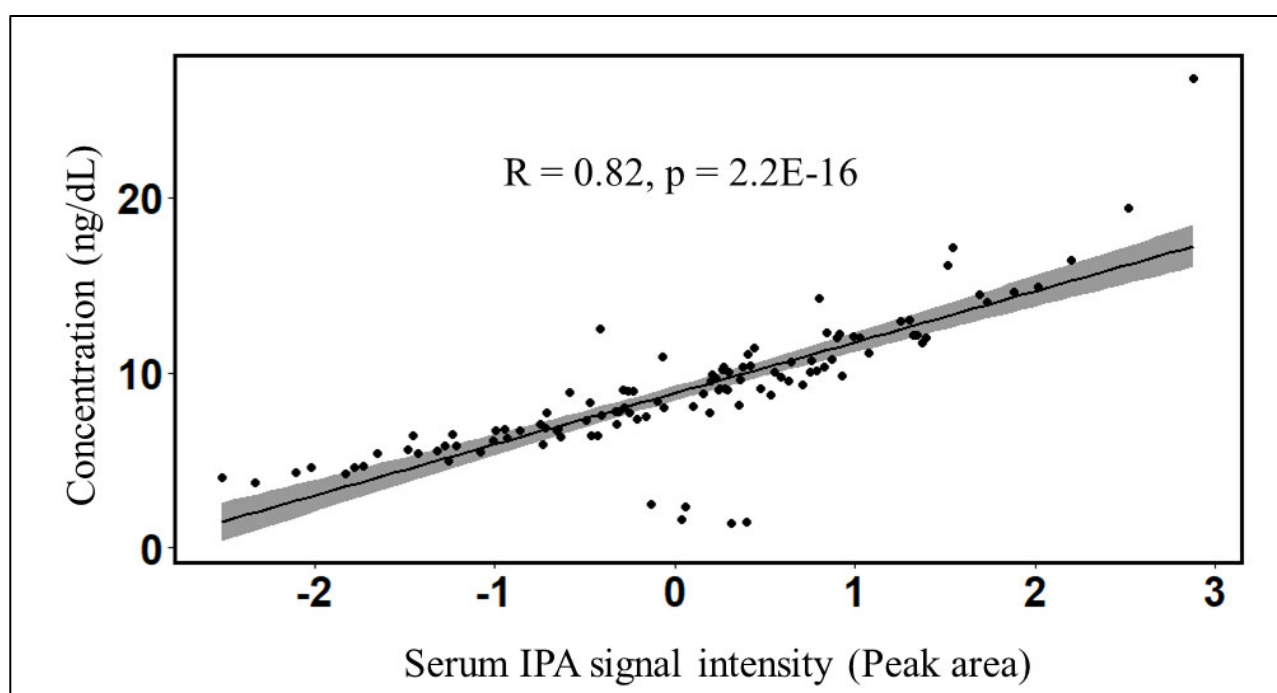

Scatter plot presents the inverse-normalized serum IPA signal intensities (x-axis) and square root-normal-IPA concentrations (ng/dL) (y-axis). Each dot represents individuals from KOBS with both the measurements.

**Figure S2. Associations of serum IPA signal intensity with steatosis and ballooning, based on presence (all except 0) or absence (stage/grade 0) of either steatosis or ballooning in individuals with or without T2D**

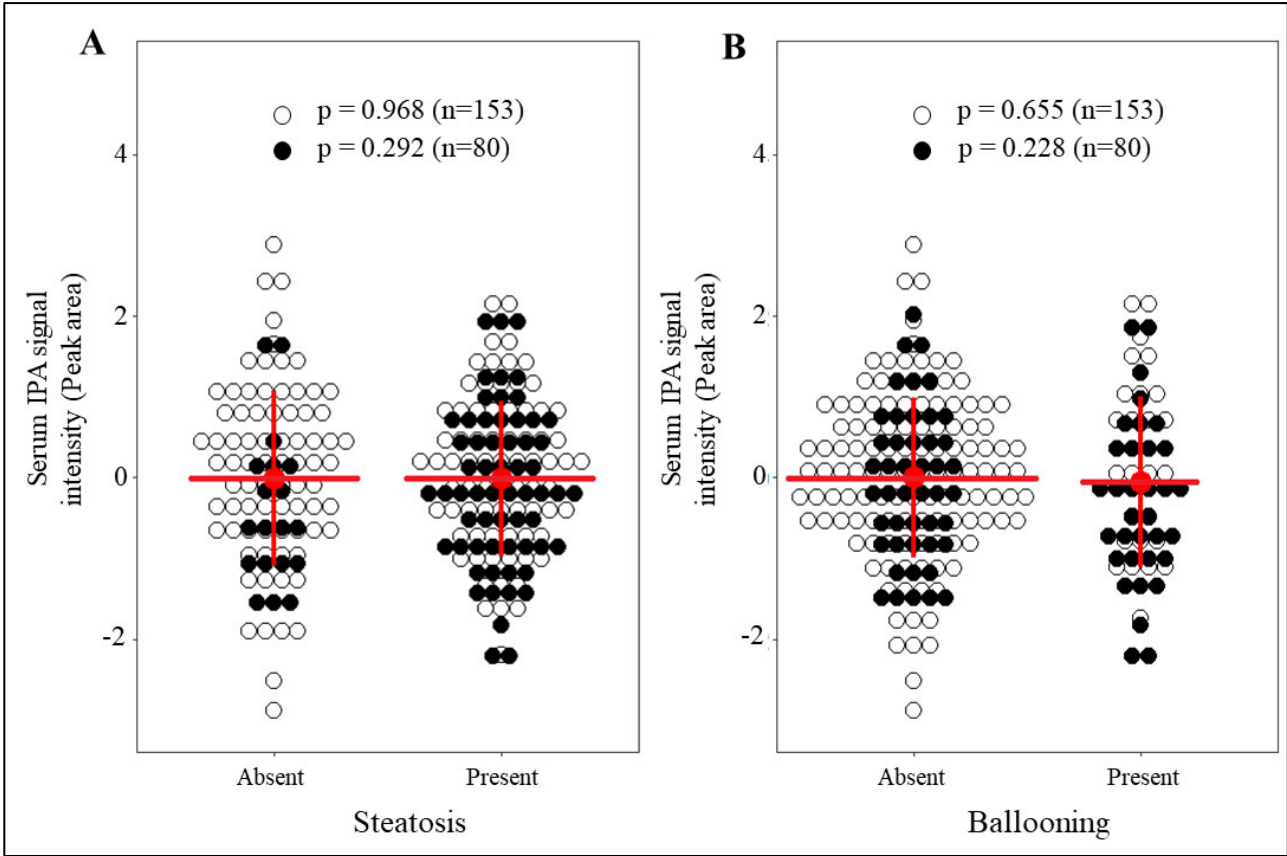

Dot plot presents the inverse-normalized serum IPA signal intensities (y-axis) for (A) Steatosis and (B) Ballooning. The white dots are individuals without T2D, and black are those with T2D. Red line and whiskers represent mean serum IPA signal intensity and SD respectively for whole population. General linear model (univariate) test results p value is shown as p for each comparison between presence or absence of each specific histological characteristic separately in those with and without T2D.

Figure S3. Associations of serum IPA signal intensity across all the stages/grades within each of the liver histology with or without T2D

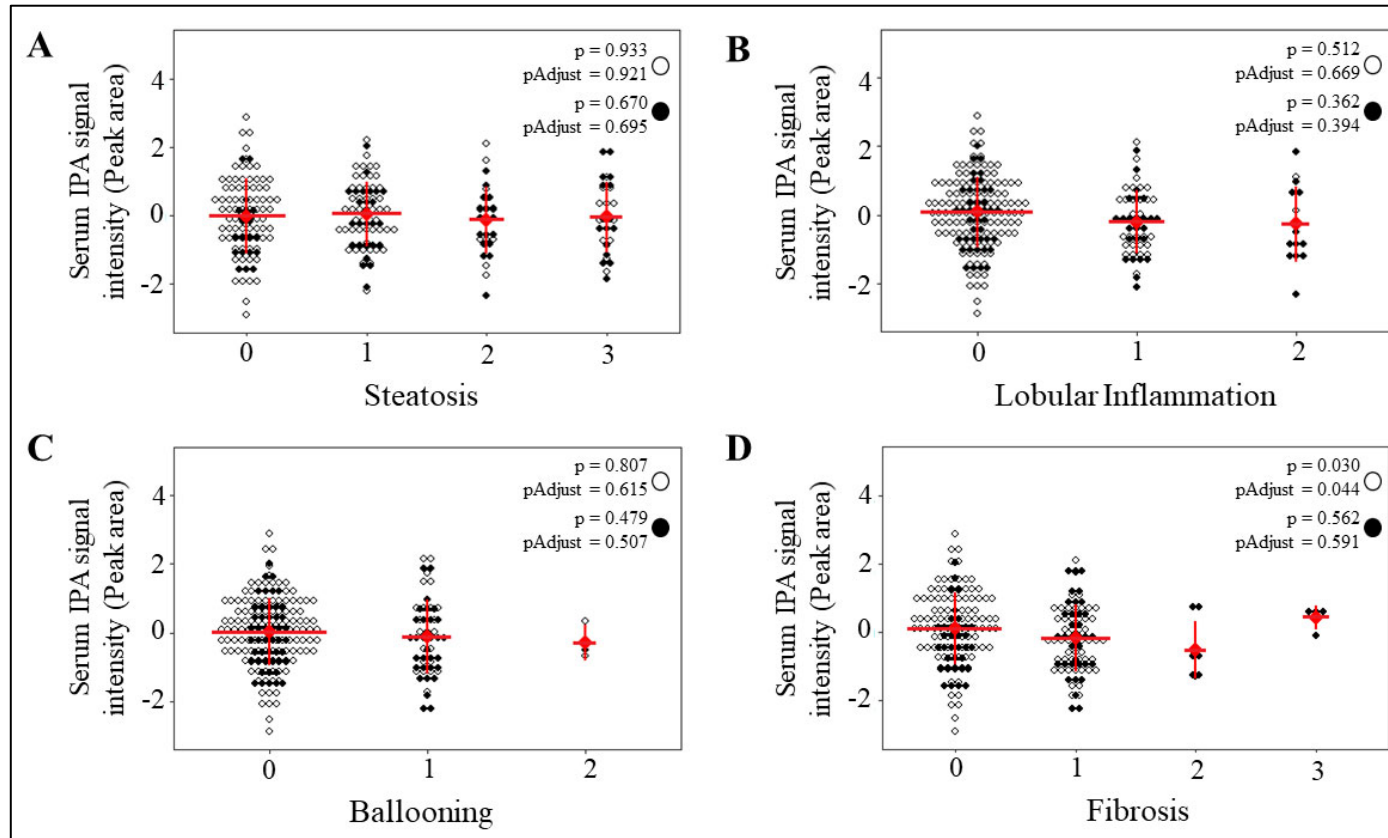

Dot plot presents the inverse-normalized serum IPA signal intensities (y-axis) across the (A) Steatosis, (B) Lobular inflammation, (C) Ballooning and (D) Fibrosis.

The white dots are individuals without T2D, and black are those with T2D. Red line and whiskers represent mean serum IPA signal intensity and SD respectively for whole population. General linear model (univariate) test results are shown as p value and results for model further adjusted for age, gender, and BMI are shown as pAdjust separately in those with and without T2D.

**Table S1.** Characteristics of the individuals undergoing bariatric surgery with IPA signal intensity identified using non-targeted and IPA concentrations using targeted metabolomics included in the current study.

|                               | IPA signal intensity | IPA concentration  | p value |
|-------------------------------|----------------------|--------------------|---------|
| Total, N (men/women)          | 233 (64/169)         | 121 (36/85)        | 0.651   |
| Age (years)                   | 48.3 ± 9.3           | 48.4 ± 9.4         | 0.955   |
| BMI (kg/m <sup>2</sup> )      | 43.1 ± 5.4           | 42.9 ± 5.3         | 0.780   |
| fS-Total cholesterol (mmol/l) | 4.2 ± 0.9            | 4.2 ± 0.9          | 0.396   |
| fS-LDL cholesterol (mmol/l)   | 2.4 ± 0.8            | 2.3 ± 0.8          | 0.480   |
| fS-HDL cholesterol (mmol/l)   | 1.1 ± 0.3            | 1.1 ± 0.3          | 0.485   |
| fS-Triglycerides (mmol/l)     | 1.3 (1.0 – 1.9)      | 1.4 (1.1 – 1.9)    | 0.915   |
| fP-glucose (mmol/l)           | 6.5 ± 1.8            | 6.5 ± 1.9          | 0.852   |
| fS-insulin (mU/l)             | 16.3 (11.0 – 23.1)   | 15.8 (10.5 – 24.1) | 0.347   |
| Type 2 diabetes, N (%)        | 80 (34.3)            | 40 (33.1)          | 0.810   |
| Steatosis grade, N <5%        | 97                   | 45                 |         |
| 5-33%                         | 77                   | 44                 |         |
| 33-66%                        | 30                   | 15                 |         |
| >66%                          | 29                   | 17                 |         |
| Lobular inflammation, N, 0    | 161                  | 82                 |         |
| 1                             | 56                   | 31                 |         |
| 2                             | 16                   | 8                  |         |
| Ballooning, N, 0              | 175                  | 84                 |         |
| 1                             | 55                   | 37                 |         |
| 2                             | 3                    | 0                  |         |
| Fibrosis, N, 0                | 136                  | 63                 |         |
| 1                             | 85                   | 50                 |         |
| 2                             | 8                    | 4                  |         |

Data shown as mean  $\pm$  SD or median (IQR). fS - fasting serum, fP - fasting plasma, HDL – High density lipoprotein, LDL – Low density lipoprotein, N – number of individuals.

**Table S2.** Primer sequences

| Gene ID                       | Primer         | Sequence                    | References |
|-------------------------------|----------------|-----------------------------|------------|
| <i>COL1A2</i>                 | Forward primer | 5'-TGGTCTCGGTGGGAACCTTG     | [1]        |
|                               | Reverse primer | 5'-CACCTGTGGTCCAACAAC       |            |
| <i><math>\alpha</math>SMA</i> | Forward primer | 5'-AATCCTGACCCTGAAGTACC     | [1]        |
|                               | Reverse primer | 5'-TAGAAAGAGTGGTGCCAGAT     |            |
| <i>MMP2</i>                   | Forward primer | 5'-AAGTATGGCTTCTGCCCTGA     | [2]        |
|                               | Reverse primer | 5'-TCCATCCTGCAGTTTTCCAG     |            |
| <i>TIMP1</i>                  | Forward primer | 5'-CAAGATGTATAAAGGGTTCCAAGC | [2]        |
|                               | Reverse primer | 5'-TCCATCCTGCAGTTTTCCAG     |            |
| <i>ITGA3</i>                  | Forward primer | 5'- CAGACCTGAACAATGATGGGTGG | [3]        |
|                               | Reverse primer | 5'- AGCCCCTTAGAGCTACTGTGA   |            |
| <i>RPLP0</i>                  | Forward primer | 5'-GGCGACCTGGAAGTCCAAC      | [4]        |
|                               | Reverse primer | 5'-CCATCAGCACACAGCCTTC      |            |

**Table S3.** List of liver transcripts/genes significantly associated with IPA levels.

| Ensemble ID     | Gene ID           | Type                 | logFC    | logCPM   | F        | P value  |
|-----------------|-------------------|----------------------|----------|----------|----------|----------|
| ENSG00000018280 | <i>SLC11A1</i>    | protein_coding       | 2.84E-06 | 1.119015 | 22.28724 | 4.87E-06 |
| ENSG00000204839 | <i>MROH6</i>      | protein_coding       | 3.95E-06 | 2.196707 | 20.49504 | 1.12E-05 |
| ENSG00000114738 | <i>MAPKAPK3</i>   | protein_coding       | 1.57E-06 | 3.656099 | 19.3433  | 1.91E-05 |
| ENSG00000025770 | <i>NCAPH2</i>     | protein_coding       | 1.08E-06 | 3.843419 | 18.54083 | 2.8E-05  |
| ENSG00000284879 | <i>AC133644.3</i> | processed_transcript | 2.36E-06 | 1.110261 | 17.09499 | 5.56E-05 |
| ENSG00000148541 | <i>FAM13C</i>     | protein_coding       | -2.2E-06 | 1.671719 | 14.80407 | 0.000168 |
| ENSG00000249970 | <i>AC074250.1</i> | processed_pseudogene | 2.54E-06 | 1.655974 | 14.6788  | 0.000179 |
| ENSG00000154553 | <i>PDLIM3</i>     | protein_coding       | -3.5E-06 | 1.22309  | 14.67117 | 0.000179 |
| ENSG00000177058 | <i>SLC38A9</i>    | protein_coding       | -8E-07   | 3.953832 | 14.67047 | 0.000179 |
| ENSG00000211455 | <i>STK38L</i>     | protein_coding       | -8.7E-07 | 4.0143   | 13.92165 | 0.000259 |
| ENSG00000103449 | <i>SALL1</i>      | protein_coding       | 1.57E-06 | 5.23946  | 13.27405 | 0.000357 |
| ENSG00000115380 | <i>EFEMP1</i>     | protein_coding       | -4E-06   | 2.386421 | 13.14355 | 0.00038  |

|                 |                   |                      |          |          |          |          |
|-----------------|-------------------|----------------------|----------|----------|----------|----------|
| ENSG00000114737 | <i>CISH</i>       | protein_coding       | 4.46E-06 | 3.815758 | 13.13453 | 0.000382 |
| ENSG00000087589 | <i>CASS4</i>      | protein_coding       | 1.53E-06 | 0.928277 | 13.08869 | 0.000391 |
| ENSG00000005884 | <i>ITGA3</i>      | protein_coding       | -2.1E-06 | 2.679976 | 12.96834 | 0.000415 |
| ENSG00000139329 | <i>LUM</i>        | protein_coding       | -2.9E-06 | 4.327572 | 12.41848 | 0.000545 |
| ENSG00000121989 | <i>ACVR2A</i>     | protein_coding       | -7.1E-07 | 4.207775 | 12.30649 | 0.000577 |
| ENSG00000095794 | <i>CREM</i>       | protein_coding       | 1.11E-06 | 3.414095 | 12.25886 | 0.000591 |
| ENSG00000248050 | <i>AC079061.1</i> | antisense            | 7.26E-06 | 2.579942 | 12.22562 | 0.000601 |
| ENSG00000249173 | <i>LINC01093</i>  | lincRNA              | 2.34E-06 | 5.261332 | 12.22021 | 0.000602 |
| ENSG00000260244 | <i>AC104083.1</i> | sense_overlapping    | -1.8E-06 | 2.814562 | 12.15701 | 0.000622 |
| ENSG00000174807 | <i>CD248</i>      | protein_coding       | -2.7E-06 | 0.286128 | 12.11757 | 0.000634 |
| ENSG00000112655 | <i>PTK7</i>       | protein_coding       | -2.3E-06 | 1.357102 | 12.09881 | 0.00064  |
| ENSG00000119535 | <i>CSF3R</i>      | protein_coding       | 2.23E-06 | 3.208674 | 12.03747 | 0.00066  |
| ENSG00000103319 | <i>EEF2K</i>      | protein_coding       | 8.22E-07 | 4.81295  | 11.93712 | 0.000694 |
| ENSG00000246985 | <i>SOCS2-AS1</i>  | processed_transcript | 3.55E-06 | 0.732009 | 11.9071  | 0.000704 |
| ENSG00000170085 | <i>SIMC1</i>      | protein_coding       | 1.4E-06  | 2.985512 | 11.7922  | 0.000746 |
| ENSG00000131711 | <i>MAP1B</i>      | protein_coding       | -2.3E-06 | 3.284154 | 11.78913 | 0.000747 |
| ENSG00000172348 | <i>RCAN2</i>      | protein_coding       | -2.3E-06 | 2.174652 | 11.74802 | 0.000763 |
| ENSG00000044524 | <i>EPHA3</i>      | protein_coding       | -2.3E-06 | 3.952663 | 11.69574 | 0.000783 |
| ENSG00000267395 | <i>DM1-AS</i>     | antisense            | 1.76E-06 | 0.639942 | 11.47357 | 0.000876 |
| ENSG00000274605 | <i>AL355338.1</i> | lincRNA              | 1.69E-06 | 2.181794 | 11.36476 | 0.000925 |
| ENSG00000076716 | <i>GPC4</i>       | protein_coding       | -2.7E-06 | 1.153597 | 11.25681 | 0.000977 |
| ENSG00000118298 | <i>CA14</i>       | protein_coding       | 3.23E-06 | 1.12918  | 11.10947 | 0.001053 |
| ENSG00000225335 | <i>AC016027.1</i> | antisense            | 2.05E-06 | 0.323028 | 10.98718 | 0.00112  |
| ENSG00000184347 | <i>SLIT3</i>      | protein_coding       | -2.8E-06 | 2.961303 | 10.90849 | 0.001166 |
| ENSG00000152359 | <i>POC5</i>       | protein_coding       | -1E-06   | 2.227086 | 10.87867 | 0.001183 |
| ENSG00000163220 | <i>S100A9</i>     | protein_coding       | 3.73E-06 | 2.236294 | 10.82163 | 0.001218 |
| ENSG00000112144 | <i>ICK</i>        | protein_coding       | -5.9E-07 | 4.15351  | 10.81921 | 0.00122  |
| ENSG00000082269 | <i>FAM135A</i>    | protein_coding       | -8E-07   | 3.566426 | 10.80434 | 0.001229 |
| ENSG00000147257 | <i>GPC3</i>       | protein_coding       | -5.2E-06 | 1.276956 | 10.79281 | 0.001236 |
| ENSG00000205959 | <i>AC105345.1</i> | lincRNA              | 1.84E-06 | 0.714072 | 10.75383 | 0.001261 |
| ENSG00000153956 | <i>CACNA2D1</i>   | protein_coding       | -1.9E-06 | 2.256197 | 10.71389 | 0.001287 |
| ENSG00000105327 | <i>BBC3</i>       | protein_coding       | -2.5E-06 | 0.552811 | 10.69901 | 0.001296 |
| ENSG00000243466 | <i>IGKV1-5</i>    | IG_V_gene            | -3.7E-06 | 2.355315 | 10.68921 | 0.001303 |
| ENSG00000118620 | <i>ZNF430</i>     | protein_coding       | -1.5E-06 | 2.024415 | 10.64507 | 0.001332 |

|                 |            |                |          |          |          |          |
|-----------------|------------|----------------|----------|----------|----------|----------|
| ENSG00000067798 | NAV3       | protein_coding | -2.7E-06 | 2.691602 | 10.62453 | 0.001346 |
| ENSG00000121440 | PDZRN3     | protein_coding | -2E-06   | 1.629408 | 10.61293 | 0.001354 |
| ENSG00000114735 | HEMK1      | protein_coding | 9.85E-07 | 5.441855 | 10.59032 | 0.00137  |
| ENSG00000188536 | HBA2       | protein_coding | 4.78E-06 | 3.535438 | 10.54219 | 0.001404 |
| ENSG00000145147 | SLIT2      | protein_coding | -1.9E-06 | 2.387672 | 10.53688 | 0.001408 |
| ENSG00000137269 | LRRC1      | protein_coding | -2.6E-06 | 0.368831 | 10.35686 | 0.001543 |
| ENSG00000106624 | AEBP1      | protein_coding | -2.8E-06 | 4.822716 | 10.34966 | 0.001549 |
| ENSG00000164659 | KIAA1324L  | protein_coding | -2.2E-06 | 1.453986 | 10.34103 | 0.001556 |
| ENSG00000122557 | HERPUD2    | protein_coding | -6.8E-07 | 4.261798 | 10.32076 | 0.001572 |
| ENSG00000123096 | SSPN       | protein_coding | -2.8E-06 | 1.305391 | 10.28643 | 0.0016   |
| ENSG00000163959 | SLC51A     | protein_coding | 1.82E-06 | 4.902774 | 10.20047 | 0.001672 |
| ENSG00000280344 | AC009166.2 | TEC            | 1.66E-06 | 1.763798 | 10.19525 | 0.001676 |
| ENSG00000284779 | IGF2       | protein_coding | 1.05E-06 | 3.550311 | 10.12326 | 0.001739 |
| ENSG00000164087 | POC1A      | protein_coding | 1.39E-06 | 0.950629 | 10.11646 | 0.001745 |
| ENSG00000200959 | SNORA74A   | snoRNA         | -2.7E-06 | 3.491249 | 10.08201 | 0.001776 |
| ENSG00000102349 | KLF8       | protein_coding | -1.8E-06 | 1.836285 | 10.05928 | 0.001797 |
| ENSG00000115523 | GNLY       | protein_coding | 3E-06    | 2.215801 | 10.05662 | 0.001799 |
| ENSG00000137831 | UACA       | protein_coding | -8.4E-07 | 5.272735 | 10.0366  | 0.001818 |
| ENSG00000200156 | RNU5B-1    | snRNA          | -3E-06   | 2.897557 | 10.0148  | 0.001838 |
| ENSG00000153214 | TMEM87B    | protein_coding | -8.3E-07 | 3.663641 | 10.01421 | 0.001839 |
| ENSG00000050165 | DKK3       | protein_coding | -2.5E-06 | 2.50636  | 10.0013  | 0.001851 |
| ENSG00000078902 | TOLLIP     | protein_coding | 7.06E-07 | 5.902184 | 9.976223 | 0.001875 |
| ENSG00000134531 | EMP1       | protein_coding | -2.9E-06 | 2.108945 | 9.944759 | 0.001906 |
| ENSG00000143641 | GALNT2     | protein_coding | 1.25E-06 | 6.379881 | 9.802961 | 0.00205  |
| ENSG00000183722 | LHFPL6     | protein_coding | -2E-06   | 3.017355 | 9.752516 | 0.002103 |
| ENSG00000144857 | BOC        | protein_coding | -3.1E-06 | 1.150561 | 9.646307 | 0.002222 |
| ENSG00000163531 | NFASC      | protein_coding | -2.1E-06 | 4.533246 | 9.634301 | 0.002235 |
| ENSG00000188158 | NHS        | protein_coding | -1.7E-06 | 0.642654 | 9.611587 | 0.002262 |
| ENSG00000150681 | RGS18      | protein_coding | 2.34E-06 | 1.16377  | 9.61129  | 0.002262 |
| ENSG00000182836 | PLCXD3     | protein_coding | -2.4E-06 | 2.51345  | 9.590739 | 0.002286 |
| ENSG00000101384 | JAG1       | protein_coding | -1.7E-06 | 4.36437  | 9.587432 | 0.00229  |
| ENSG00000198542 | ITGBL1     | protein_coding | -3.4E-06 | 2.534599 | 9.580099 | 0.002299 |
| ENSG00000119720 | NRDE2      | protein_coding | 8.99E-07 | 5.131679 | 9.5673   | 0.002314 |
| ENSG00000274750 | HIST1H3E   | protein_coding | -1.5E-06 | 1.148496 | 9.552954 | 0.002331 |



|                 |                   |                |          |          |          |          |
|-----------------|-------------------|----------------|----------|----------|----------|----------|
| ENSG00000169604 | <i>ANTXR1</i>     | protein_coding | -2E-06   | 3.682345 | 9.509745 | 0.002384 |
| ENSG00000137077 | <i>CCL21</i>      | protein_coding | -2.8E-06 | 2.339562 | 9.449208 | 0.002459 |
| ENSG00000085365 | <i>SCAMP1</i>     | protein_coding | -9E-07   | 4.032782 | 9.448159 | 0.002461 |
| ENSG00000154096 | <i>THY1</i>       | protein_coding | -3.3E-06 | 1.576305 | 9.425157 | 0.00249  |
| ENSG00000140545 | <i>MFGE8</i>      | protein_coding | -2E-06   | 2.569044 | 9.35078  | 0.002587 |
| ENSG00000166548 | <i>TK2</i>        | protein_coding | 6.33E-07 | 4.973501 | 9.345472 | 0.002595 |
| ENSG00000115904 | <i>SOS1</i>       | protein_coding | -4.5E-07 | 5.483013 | 9.27655  | 0.002689 |
| ENSG00000050555 | <i>LAMC3</i>      | protein_coding | -2.6E-06 | 3.271781 | 9.273244 | 0.002693 |
| ENSG00000143603 | <i>KCNN3</i>      | protein_coding | -2.3E-06 | 1.286506 | 9.272663 | 0.002694 |
| ENSG00000058272 | <i>PPP1R12A</i>   | protein_coding | -5.9E-07 | 5.229586 | 9.264378 | 0.002706 |
| ENSG00000171747 | <i>LGALS4</i>     | protein_coding | -3.7E-06 | 4.994463 | 9.238331 | 0.002742 |
| ENSG00000084636 | <i>COL16A1</i>    | protein_coding | -2.6E-06 | 3.117652 | 9.203396 | 0.002793 |
| ENSG00000167910 | <i>CYP7A1</i>     | protein_coding | -5.1E-06 | 5.501106 | 9.193159 | 0.002807 |
| ENSG00000172465 | <i>TCEAL1</i>     | protein_coding | -1.1E-06 | 1.874574 | 9.183305 | 0.002822 |
| ENSG00000107317 | <i>PTGDS</i>      | protein_coding | -3.4E-06 | 1.458723 | 9.138879 | 0.002887 |
| ENSG00000113248 | <i>PCDHB15</i>    | protein_coding | -1.7E-06 | 0.503104 | 9.11151  | 0.002929 |
| ENSG00000185630 | <i>PBX1</i>       | protein_coding | -1.6E-06 | 5.002058 | 9.107266 | 0.002935 |
| ENSG00000152413 | <i>HOMER1</i>     | protein_coding | -2.2E-06 | 0.559963 | 9.097398 | 0.00295  |
| ENSG00000103148 | <i>NPRL3</i>      | protein_coding | 8.97E-07 | 3.926371 | 9.093916 | 0.002956 |
| ENSG00000116194 | <i>ANGPTL1</i>    | protein_coding | -1.8E-06 | 3.859418 | 9.078949 | 0.002979 |
| ENSG00000113721 | <i>PDGFRB</i>     | protein_coding | -1.4E-06 | 5.278279 | 9.072411 | 0.002989 |
| ENSG00000166963 | <i>MAP1A</i>      | protein_coding | -2.5E-06 | 0.52824  | 9.071829 | 0.00299  |
| ENSG00000263884 | <i>AP000845.1</i> | lincRNA        | 1.49E-06 | 0.209356 | 9.066536 | 0.002998 |
| ENSG00000196569 | <i>LAMA2</i>      | protein_coding | -1.7E-06 | 4.840701 | 9.052215 | 0.00302  |
| ENSG00000068650 | <i>ATP11A</i>     | protein_coding | 7.46E-07 | 5.627247 | 8.962975 | 0.003164 |
| ENSG00000210100 | <i>MT-TI</i>      | Mt_tRNA        | -3.2E-06 | 1.999111 | 8.942618 | 0.003197 |
| ENSG00000182359 | <i>KBTBD3</i>     | protein_coding | -1.1E-06 | 1.896776 | 8.930177 | 0.003218 |
| ENSG00000156535 | <i>CD109</i>      | protein_coding | -2.1E-06 | 2.293826 | 8.929866 | 0.003218 |
| ENSG00000163590 | <i>PPM1L</i>      | protein_coding | -1.3E-06 | 4.044627 | 8.896158 | 0.003275 |
| ENSG00000240891 | <i>PLCXD2</i>     | protein_coding | 9.4E-07  | 2.968763 | 8.883325 | 0.003297 |
| ENSG00000163520 | <i>FBLN2</i>      | protein_coding | -2E-06   | 2.544001 | 8.881845 | 0.0033   |
| ENSG00000157637 | <i>SLC38A10</i>   | protein_coding | 6.95E-07 | 6.64892  | 8.869279 | 0.003322 |
| ENSG00000213020 | <i>ZNF611</i>     | protein_coding | -9.6E-07 | 2.929945 | 8.851218 | 0.003353 |
| ENSG00000018625 | <i>ATP1A2</i>     | protein_coding | -2.9E-06 | 1.280614 | 8.811509 | 0.003423 |

|                 |                   |                                    |          |          |          |          |
|-----------------|-------------------|------------------------------------|----------|----------|----------|----------|
| ENSG00000189195 | <i>BTBD8</i>      | protein_coding                     | -9.8E-07 | 2.96701  | 8.789286 | 0.003463 |
| ENSG00000071967 | <i>CYBRD1</i>     | protein_coding                     | -1.7E-06 | 4.647761 | 8.786626 | 0.003468 |
| ENSG00000072952 | <i>MRVI1</i>      | protein_coding                     | -2.1E-06 | 2.147302 | 8.723845 | 0.003583 |
| ENSG00000150636 | <i>CCDC102B</i>   | protein_coding                     | -1.6E-06 | 2.038658 | 8.646751 | 0.00373  |
| ENSG00000151067 | <i>CACNA1C</i>    | protein_coding                     | -2.4E-06 | 2.528584 | 8.629304 | 0.003764 |
| ENSG00000175137 | <i>SH3BP5L</i>    | protein_coding                     | 7.21E-07 | 3.911877 | 8.629284 | 0.003764 |
| ENSG00000130300 | <i>PLVAP</i>      | protein_coding                     | -2E-06   | 1.834851 | 8.626891 | 0.003769 |
| ENSG00000137809 | <i>ITGA11</i>     | protein_coding                     | -1.4E-06 | 1.936862 | 8.582336 | 0.003858 |
| ENSG00000196172 | <i>ZNF681</i>     | protein_coding                     | -1.9E-06 | 0.379179 | 8.559463 | 0.003904 |
| ENSG00000144810 | <i>COL8A1</i>     | protein_coding                     | -2.6E-06 | 0.817207 | 8.537921 | 0.003948 |
| ENSG00000186479 | <i>RGS7BP</i>     | protein_coding                     | -2.2E-06 | 1.386338 | 8.530713 | 0.003963 |
| ENSG00000033170 | <i>FUT8</i>       | protein_coding                     | -1.1E-06 | 2.662673 | 8.520891 | 0.003984 |
| ENSG00000143546 | <i>S100A8</i>     | protein_coding                     | 3.64E-06 | 0.936443 | 8.512234 | 0.004002 |
| ENSG00000154065 | <i>ANKRD29</i>    | protein_coding                     | -2.3E-06 | 1.347326 | 8.505798 | 0.004015 |
| ENSG00000233836 | <i>AC139769.1</i> | transcribed_unprocessed_pseudogene | -2.5E-06 | 0.699237 | 8.501805 | 0.004024 |
| ENSG00000076706 | <i>MCAM</i>       | protein_coding                     | -2E-06   | 3.224506 | 8.493396 | 0.004041 |
| ENSG00000160075 | <i>SSU72</i>      | protein_coding                     | 4.56E-07 | 5.081634 | 8.485667 | 0.004058 |
| ENSG00000099139 | <i>PCSK5</i>      | protein_coding                     | -1.9E-06 | 2.780303 | 8.466437 | 0.004099 |
| ENSG00000113657 | <i>DPYSL3</i>     | protein_coding                     | -2.1E-06 | 2.83635  | 8.45541  | 0.004122 |
| ENSG00000214264 | <i>KCTD9P4</i>    | processed_pseudogene               | 2.54E-06 | 2.607101 | 8.450629 | 0.004133 |
| ENSG00000205726 | <i>ITSN1</i>      | protein_coding                     | 6.82E-07 | 5.784821 | 8.436858 | 0.004163 |
| ENSG00000107362 | <i>ABHD17B</i>    | protein_coding                     | -6.6E-07 | 3.410442 | 8.435935 | 0.004165 |
| ENSG00000147852 | <i>VLDLR</i>      | protein_coding                     | -2.6E-06 | 1.318024 | 8.42989  | 0.004178 |
| ENSG00000164342 | <i>TLR3</i>       | protein_coding                     | -1.1E-06 | 3.664322 | 8.419753 | 0.0042   |
| ENSG00000188290 | <i>HES4</i>       | protein_coding                     | -2E-06   | 0.2896   | 8.414237 | 0.004212 |
| ENSG00000137819 | <i>PAQR5</i>      | protein_coding                     | -2.2E-06 | 1.210912 | 8.401254 | 0.004241 |
| ENSG00000133392 | <i>MYH11</i>      | protein_coding                     | -3E-06   | 4.608934 | 8.361327 | 0.004331 |
| ENSG00000171150 | <i>SOCS5</i>      | protein_coding                     | -5.5E-07 | 3.882494 | 8.35799  | 0.004338 |
| ENSG00000138172 | <i>CALHM2</i>     | protein_coding                     | -1.6E-06 | 1.530233 | 8.356226 | 0.004342 |
| ENSG00000123352 | <i>SPATS2</i>     | protein_coding                     | -9.7E-07 | 2.588652 | 8.354516 | 0.004346 |
| ENSG00000113971 | <i>NPHP3</i>      | protein_coding                     | -9.9E-07 | 3.504577 | 8.340747 | 0.004378 |
| ENSG00000269825 | <i>AC022150.4</i> | sense_intronic                     | -1.9E-06 | 0.987782 | 8.329791 | 0.004403 |
| ENSG00000150630 | <i>VEGFC</i>      | protein_coding                     | -1.7E-06 | 1.241819 | 8.306073 | 0.004458 |
| ENSG00000143196 | <i>DPT</i>        | protein_coding                     | -2.8E-06 | 2.411336 | 8.242784 | 0.004609 |

|                 |                   |                |          |          |          |          |
|-----------------|-------------------|----------------|----------|----------|----------|----------|
| ENSG00000102287 | <i>GABRE</i>      | protein_coding | -2.3E-06 | 3.266803 | 8.238715 | 0.004619 |
| ENSG00000198521 | <i>ZNF43</i>      | protein_coding | -1.3E-06 | 2.537952 | 8.230705 | 0.004638 |
| ENSG00000108691 | <i>CCL2</i>       | protein_coding | -2.5E-06 | 0.906991 | 8.184086 | 0.004753 |
| ENSG00000115942 | <i>ORC2</i>       | protein_coding | 1.02E-06 | 4.403352 | 8.180559 | 0.004762 |
| ENSG00000138448 | <i>ITGAV</i>      | protein_coding | -1E-06   | 5.547642 | 8.175468 | 0.004775 |
| ENSG00000206077 | <i>ZDHHC11B</i>   | protein_coding | 2.85E-06 | 2.955973 | 8.148894 | 0.004842 |
| ENSG00000232442 | <i>MHENCR</i>     | antisense      | 1.25E-06 | 0.905764 | 8.103784 | 0.004958 |
| ENSG00000211660 | <i>IGLV2-23</i>   | IG_V_gene      | -3E-06   | 1.61047  | 8.079737 | 0.005021 |
| ENSG00000109339 | <i>MAPK10</i>     | protein_coding | -1.5E-06 | 3.277441 | 8.062237 | 0.005068 |
| ENSG00000188818 | <i>ZDHHC11</i>    | protein_coding | 2.39E-06 | 2.72473  | 8.055938 | 0.005085 |
| ENSG00000088356 | <i>PDRG1</i>      | protein_coding | 8.35E-07 | 1.703354 | 7.99843  | 0.005241 |
| ENSG00000138621 | <i>PPCDC</i>      | protein_coding | 8.04E-07 | 2.868271 | 7.991743 | 0.00526  |
| ENSG00000140365 | <i>COMMD4</i>     | protein_coding | 5.95E-07 | 3.57823  | 7.989935 | 0.005265 |
| ENSG00000271347 | <i>AC124312.5</i> | sense_intronic | -1.3E-06 | 1.105468 | 7.987788 | 0.005271 |
| ENSG00000151458 | <i>ANKRD50</i>    | protein_coding | -8.5E-07 | 4.714744 | 7.972044 | 0.005314 |
| ENSG00000112936 | <i>C7</i>         | protein_coding | -2.5E-06 | 7.379265 | 7.918834 | 0.005466 |
| ENSG00000143889 | <i>HNRNPLL</i>    | protein_coding | -6.1E-07 | 3.695477 | 7.889142 | 0.005552 |
| ENSG00000068366 | <i>ACSL4</i>      | protein_coding | -3.9E-06 | 4.560876 | 7.884741 | 0.005565 |
| ENSG00000213903 | <i>LTB4R</i>      | protein_coding | 1.05E-06 | 3.139378 | 7.862652 | 0.00563  |
| ENSG00000118785 | <i>SPP1</i>       | protein_coding | -3.8E-06 | 2.913241 | 7.860635 | 0.005636 |
| ENSG00000150907 | <i>FOXO1</i>      | protein_coding | 1.43E-06 | 5.312771 | 7.853529 | 0.005658 |
| ENSG00000188153 | <i>COL4A5</i>     | protein_coding | -1.6E-06 | 3.161108 | 7.848165 | 0.005674 |
| ENSG00000206538 | <i>VGLL3</i>      | protein_coding | -3E-06   | 1.181391 | 7.834179 | 0.005716 |
| ENSG00000143702 | <i>CEP170</i>     | protein_coding | -6.3E-07 | 4.195057 | 7.830027 | 0.005728 |
| ENSG00000211668 | <i>IGLV2-11</i>   | IG_V_gene      | -3.4E-06 | 1.179822 | 7.829836 | 0.005729 |
| ENSG00000128567 | <i>PODXL</i>      | protein_coding | -1.9E-06 | 3.830004 | 7.824736 | 0.005744 |
| ENSG00000095015 | <i>MAP3K1</i>     | protein_coding | -6.8E-07 | 4.85003  | 7.809535 | 0.005791 |
| ENSG00000153558 | <i>FBXL2</i>      | protein_coding | -2.2E-06 | 0.167565 | 7.808133 | 0.005795 |
| ENSG00000159307 | <i>SCUBE1</i>     | protein_coding | -4.1E-06 | 2.250161 | 7.789291 | 0.005853 |
| ENSG00000158258 | <i>CLSTN2</i>     | protein_coding | -2.5E-06 | 2.651547 | 7.763948 | 0.005932 |
| ENSG00000125257 | <i>ABCC4</i>      | protein_coding | -1.9E-06 | 2.665024 | 7.751617 | 0.005971 |
| ENSG00000169435 | <i>RASSF6</i>     | protein_coding | -2.9E-06 | 0.773818 | 7.74533  | 0.005991 |
| ENSG00000081760 | <i>AACS</i>       | protein_coding | -1.5E-06 | 2.527871 | 7.709513 | 0.006106 |
| ENSG00000163322 | <i>ABRAXAS1</i>   | protein_coding | -1E-06   | 2.269126 | 7.705015 | 0.00612  |

|                 |                   |                      |          |          |          |          |
|-----------------|-------------------|----------------------|----------|----------|----------|----------|
| ENSG00000170624 | <i>SGCD</i>       | protein_coding       | -2E-06   | 2.48755  | 7.687245 | 0.006178 |
| ENSG00000198182 | <i>ZNF607</i>     | protein_coding       | -1.5E-06 | 1.026321 | 7.667142 | 0.006244 |
| ENSG00000276791 | <i>AC092117.1</i> | lincRNA              | 1.1E-06  | 1.650386 | 7.665881 | 0.006248 |
| ENSG00000115252 | <i>PDE1A</i>      | protein_coding       | -1.4E-06 | 2.396499 | 7.64427  | 0.00632  |
| ENSG00000196705 | <i>ZNF431</i>     | protein_coding       | -1.2E-06 | 2.917395 | 7.639087 | 0.006338 |
| ENSG00000077713 | <i>SLC25A43</i>   | protein_coding       | -8.9E-07 | 2.780341 | 7.628036 | 0.006375 |
| ENSG00000273148 | <i>AL035563.1</i> | lincRNA              | 1.21E-06 | 0.245218 | 7.625977 | 0.006382 |
| ENSG00000166165 | <i>CKB</i>        | protein_coding       | -1.8E-06 | 1.053394 | 7.570211 | 0.006574 |
| ENSG00000137962 | <i>ARHGAP29</i>   | protein_coding       | -7.9E-07 | 6.365542 | 7.56096  | 0.006606 |
| ENSG00000164609 | <i>SLU7</i>       | protein_coding       | -6.3E-07 | 4.064668 | 7.542275 | 0.006672 |
| ENSG00000091986 | <i>CCDC80</i>     | protein_coding       | -2.8E-06 | 3.008681 | 7.53943  | 0.006682 |
| ENSG00000105855 | <i>ITGB8</i>      | protein_coding       | -2.1E-06 | 2.362634 | 7.536668 | 0.006692 |
| ENSG00000101290 | <i>CDS2</i>       | protein_coding       | 5.95E-07 | 5.74685  | 7.523654 | 0.006738 |
| ENSG00000181472 | <i>ZBTB2</i>      | protein_coding       | -8.3E-07 | 2.416747 | 7.504859 | 0.006806 |
| ENSG00000152291 | <i>TGOLN2</i>     | protein_coding       | 7.26E-07 | 7.592884 | 7.503241 | 0.006812 |
| ENSG00000135919 | <i>SERPINE2</i>   | protein_coding       | -1.6E-06 | 2.462149 | 7.499313 | 0.006826 |
| ENSG00000063854 | <i>HAGH</i>       | protein_coding       | 6.88E-07 | 6.514672 | 7.495629 | 0.006839 |
| ENSG00000231047 | <i>GCNT1P3</i>    | processed_pseudogene | 2.57E-06 | 1.834057 | 7.457447 | 0.00698  |
| ENSG00000147642 | <i>SYBU</i>       | protein_coding       | 2.61E-06 | 4.940976 | 7.451657 | 0.007001 |
| ENSG00000164219 | <i>PGGT1B</i>     | protein_coding       | -6E-07   | 4.724315 | 7.451022 | 0.007003 |
| ENSG00000128606 | <i>LRRC17</i>     | protein_coding       | -1.5E-06 | 1.295016 | 7.450621 | 0.007005 |
| ENSG00000161298 | <i>ZNF382</i>     | protein_coding       | -1.6E-06 | 1.334508 | 7.438505 | 0.00705  |
| ENSG00000063978 | <i>RNF4</i>       | protein_coding       | 4.39E-07 | 4.215912 | 7.431859 | 0.007075 |
| ENSG00000188981 | <i>MSANTD1</i>    | protein_coding       | 1.24E-06 | 1.160087 | 7.418162 | 0.007127 |
| ENSG00000172845 | <i>SP3</i>        | protein_coding       | -5E-07   | 5.947948 | 7.40904  | 0.007162 |
| ENSG00000170017 | <i>ALCAM</i>      | protein_coding       | -7.8E-07 | 6.229886 | 7.382192 | 0.007265 |
| ENSG00000164300 | <i>SERINC5</i>    | protein_coding       | 7.82E-07 | 7.278581 | 7.37111  | 0.007308 |
| ENSG00000182050 | <i>MGAT4C</i>     | protein_coding       | -3E-06   | 0.958921 | 7.364819 | 0.007332 |
| ENSG00000176658 | <i>MYO1D</i>      | protein_coding       | -6.7E-07 | 4.90959  | 7.361353 | 0.007346 |
| ENSG00000087074 | <i>PPP1R15A</i>   | protein_coding       | -1.1E-06 | 2.747745 | 7.360224 | 0.00735  |
| ENSG00000267444 | <i>SMUG1P1</i>    | processed_pseudogene | 1.64E-06 | 2.508481 | 7.347263 | 0.007401 |
| ENSG00000223960 | <i>AC009948.1</i> | antisense            | -1.2E-06 | 1.171593 | 7.333931 | 0.007454 |
| ENSG00000283526 | <i>PRRT1B</i>     | protein_coding       | 1.53E-06 | 1.27759  | 7.288779 | 0.007636 |
| ENSG00000285854 | <i>AC010197.2</i> | protein_coding       | 1.46E-06 | 1.751771 | 7.284321 | 0.007654 |

|                 |                   |                                    |          |          |          |          |
|-----------------|-------------------|------------------------------------|----------|----------|----------|----------|
| ENSG00000164338 | <i>UTP15</i>      | protein_coding                     | -7.7E-07 | 2.801982 | 7.272226 | 0.007703 |
| ENSG00000141384 | <i>TAF4B</i>      | protein_coding                     | -1.7E-06 | 0.23516  | 7.266011 | 0.007729 |
| ENSG00000188483 | <i>IER5L</i>      | protein_coding                     | -2.2E-06 | 0.805797 | 7.261108 | 0.007749 |
| ENSG00000156603 | <i>MED19</i>      | protein_coding                     | -9.7E-07 | 1.360327 | 7.255665 | 0.007772 |
| ENSG00000173546 | <i>CSPG4</i>      | protein_coding                     | -2.3E-06 | 2.218238 | 7.244811 | 0.007817 |
| ENSG00000204291 | <i>COL15A1</i>    | protein_coding                     | -2.9E-06 | 1.138766 | 7.23644  | 0.007852 |
| ENSG00000101333 | <i>PLCB4</i>      | protein_coding                     | -2.3E-06 | 0.686582 | 7.234415 | 0.00786  |
| ENSG00000169018 | <i>FEM1B</i>      | protein_coding                     | -5E-07   | 5.440382 | 7.231402 | 0.007873 |
| ENSG00000150787 | <i>PTS</i>        | protein_coding                     | 1.24E-06 | 4.153229 | 7.228245 | 0.007886 |
| ENSG00000109929 | <i>SC5D</i>       | protein_coding                     | -1.8E-06 | 6.8491   | 7.220879 | 0.007917 |
| ENSG00000252947 | <i>SCARNA1</i>    | scaRNA                             | -2.3E-06 | 0.57656  | 7.193561 | 0.008034 |
| ENSG00000267838 | <i>AC245884.8</i> | lincRNA                            | 1.29E-06 | 0.780893 | 7.192755 | 0.008037 |
| ENSG00000140092 | <i>FBLN5</i>      | protein_coding                     | -2.1E-06 | 3.90296  | 7.185245 | 0.00807  |
| ENSG00000153094 | <i>BCL2L11</i>    | protein_coding                     | 1.34E-06 | 4.229844 | 7.184114 | 0.008075 |
| ENSG00000119681 | <i>LTBP2</i>      | protein_coding                     | -2.3E-06 | 3.396975 | 7.179832 | 0.008093 |
| ENSG00000100767 | <i>PAPLN</i>      | protein_coding                     | -2.1E-06 | 2.73615  | 7.179759 | 0.008093 |
| ENSG00000153246 | <i>PLA2R1</i>     | protein_coding                     | -1.3E-06 | 3.469199 | 7.178906 | 0.008097 |
| ENSG00000101132 | <i>PFDN4</i>      | protein_coding                     | -1.3E-06 | 1.737487 | 7.17059  | 0.008133 |
| ENSG00000132122 | <i>SPATA6</i>     | protein_coding                     | -1.1E-06 | 2.48557  | 7.161409 | 0.008173 |
| ENSG00000140937 | <i>CDH11</i>      | protein_coding                     | -2.3E-06 | 1.737493 | 7.156423 | 0.008195 |
| ENSG00000213096 | <i>ZNF254</i>     | protein_coding                     | -8.1E-07 | 4.525502 | 7.124629 | 0.008335 |
| ENSG00000112782 | <i>CLIC5</i>      | protein_coding                     | -2.3E-06 | 0.731432 | 7.10183  | 0.008438 |
| ENSG00000141505 | <i>ASGR1</i>      | protein_coding                     | 5.6E-07  | 7.939537 | 7.097394 | 0.008458 |
| ENSG00000135372 | <i>NAT10</i>      | protein_coding                     | 4.75E-07 | 4.177947 | 7.080114 | 0.008536 |
| ENSG00000114270 | <i>COL7A1</i>     | protein_coding                     | 9.78E-06 | 5.419507 | 7.079912 | 0.008537 |
| ENSG00000133606 | <i>MKRN1</i>      | protein_coding                     | 3.7E-07  | 4.956048 | 7.071247 | 0.008577 |
| ENSG00000198155 | <i>ZNF876P</i>    | transcribed_unprocessed_pseudogene | -1.2E-06 | 0.618828 | 7.070757 | 0.008579 |
| ENSG00000244734 | <i>HBB</i>        | protein_coding                     | 3.92E-06 | 5.916706 | 7.061661 | 0.008621 |
| ENSG00000202538 | <i>RNU4-2</i>     | snRNA                              | -2.1E-06 | 7.681978 | 7.054696 | 0.008653 |
| ENSG00000124279 | <i>FASTKD3</i>    | protein_coding                     | -8E-07   | 2.246395 | 7.054479 | 0.008654 |
| ENSG00000145362 | <i>ANK2</i>       | protein_coding                     | -1.5E-06 | 2.659633 | 7.049814 | 0.008676 |
| ENSG00000198324 | <i>PHETA1</i>     | protein_coding                     | 1.08E-06 | 2.734306 | 7.030372 | 0.008767 |
| ENSG00000134317 | <i>GRHL1</i>      | protein_coding                     | 1.42E-06 | 3.993837 | 7.018095 | 0.008825 |
| ENSG00000010319 | <i>SEMA3G</i>     | protein_coding                     | -2.4E-06 | 1.578617 | 7.013924 | 0.008845 |

|                 |                   |                |          |          |          |          |
|-----------------|-------------------|----------------|----------|----------|----------|----------|
| ENSG00000165617 | <i>DACT1</i>      | protein_coding | -1.6E-06 | 1.616348 | 7.003704 | 0.008893 |
| ENSG00000230630 | <i>DNM3OS</i>     | antisense      | -1.6E-06 | 2.345395 | 6.98959  | 0.008961 |
| ENSG00000162613 | <i>FUBP1</i>      | protein_coding | -4.6E-07 | 5.455007 | 6.98702  | 0.008973 |
| ENSG00000079102 | <i>RUNX1T1</i>    | protein_coding | -1.4E-06 | 2.799719 | 6.96684  | 0.009071 |
| ENSG00000165355 | <i>FBXO33</i>     | protein_coding | -6.8E-07 | 2.875549 | 6.965313 | 0.009078 |
| ENSG00000143995 | <i>MEIS1</i>      | protein_coding | -8.5E-07 | 3.481437 | 6.959375 | 0.009107 |
| ENSG00000176853 | <i>FAM91A1</i>    | protein_coding | -4.6E-07 | 5.606559 | 6.958268 | 0.009113 |
| ENSG00000280306 | <i>AC137056.2</i> | TEC            | 1.73E-06 | 4.06361  | 6.958252 | 0.009113 |
| ENSG00000134962 | <i>KLB</i>        | protein_coding | -1.7E-06 | 5.155689 | 6.957053 | 0.009119 |
| ENSG00000166024 | <i>R3HCC1L</i>    | protein_coding | -4.4E-07 | 3.650162 | 6.953241 | 0.009137 |
| ENSG00000109265 | <i>KIAA1211</i>   | protein_coding | -2.1E-06 | 0.806263 | 6.929287 | 0.009255 |
| ENSG00000163354 | <i>DCST2</i>      | protein_coding | 1.45E-06 | 0.715982 | 6.909442 | 0.009355 |
| ENSG00000163431 | <i>LMOD1</i>      | protein_coding | -2.7E-06 | 1.23824  | 6.904573 | 0.009379 |
| ENSG00000197461 | <i>PDGFA</i>      | protein_coding | -1.8E-06 | 1.329107 | 6.897921 | 0.009413 |
| ENSG00000182963 | <i>GJC1</i>       | protein_coding | -1.9E-06 | 1.159784 | 6.897905 | 0.009413 |
| ENSG00000189420 | <i>ZFP92</i>      | protein_coding | -1.4E-06 | 0.795514 | 6.891818 | 0.009444 |
| ENSG00000168743 | <i>NPNT</i>       | protein_coding | -2.3E-06 | 2.244755 | 6.890697 | 0.009449 |
| ENSG00000152580 | <i>IGSF10</i>     | protein_coding | -2.5E-06 | 2.055844 | 6.871951 | 0.009545 |
| ENSG00000102452 | <i>NALCN</i>      | protein_coding | -2.6E-06 | 1.318044 | 6.869628 | 0.009557 |
| ENSG00000124587 | <i>PEX6</i>       | protein_coding | 8.56E-07 | 4.578993 | 6.866927 | 0.009571 |
| ENSG00000135930 | <i>EIF4E2</i>     | protein_coding | 4.65E-07 | 4.734269 | 6.859873 | 0.009607 |
| ENSG00000067715 | <i>SYT1</i>       | protein_coding | 1.4E-06  | 1.015187 | 6.856321 | 0.009626 |
| ENSG00000143013 | <i>LMO4</i>       | protein_coding | -6E-07   | 3.901808 | 6.837223 | 0.009725 |
| ENSG00000154134 | <i>ROBO3</i>      | protein_coding | -1.6E-06 | 1.218562 | 6.819896 | 0.009816 |
| ENSG00000136237 | <i>RAPGEF5</i>    | protein_coding | -9.6E-07 | 5.581262 | 6.819154 | 0.00982  |
| ENSG00000139910 | <i>NOVA1</i>      | protein_coding | -1.8E-06 | 0.539668 | 6.810873 | 0.009864 |
| ENSG00000176903 | <i>PNMA1</i>      | protein_coding | -1.2E-06 | 1.457738 | 6.806187 | 0.009889 |
| ENSG00000204386 | <i>NEU1</i>       | protein_coding | -7.3E-07 | 3.992637 | 6.788035 | 0.009986 |

---

logFC – log Fold change, logCPM – log counts per million, F – F statistics.

## References

- [1] Miranda, J.F.; Scarinci, L.D.; Ramos, L.F.; Silva, C.M.; Gonçalves, L.R.; de Moraes, P.F.; Malaspina, O.; Moraes, K.C.M. The Modulatory Effect of Triclosan on the Reversion of the Activated Phenotype of LX-2 Hepatic Stellate Cells. *J. Biochem. Mol. Toxicol.* **2020**, *34*, e22413.
- [2] Robert, S.; Gicquel, T.; Bodin, A.; Lagente, V.; Boichot, E. Characterization of the MMP/TIMP Imbalance and Collagen Production Induced by IL-1 $\beta$  Or TNF- $\alpha$  Release from Human Hepatic Stellate Cells. *PLOS ONE* **2016**, *11*, e0153118.
- [3] He, X.; Tao, H.; Hu, Z.; Ma, Y.; Xu, J.; Wang, H.; Xia, Y.; Li, L.; Fei, B.; Li, Y. *et al.* Expression of Galectin-1 in Carcinoma-Associated Fibroblasts Promotes Gastric Cancer Cell Invasion through Upregulation of Integrin B1. *Cancer science* **2014**, *105*, 1402-1410.
- [4] Kaminska, D.; Hämäläinen, M.; Cederberg, H.; Käkälä, P.; Venesmaa, S.; Miettinen, P.; Ilves, I.; Herzig, K.; Kolehmainen, M.; Karhunen, L. *et al.* Adipose Tissue INSR Splicing in Humans Associates with Fasting Insulin Level and is Regulated by Weight Loss. *Diabetologia* **2014**, *57*, 347-351.
